# Supplementary material
Source: PubMed Central journal article supplement (PMC9248236)

Figure 7A

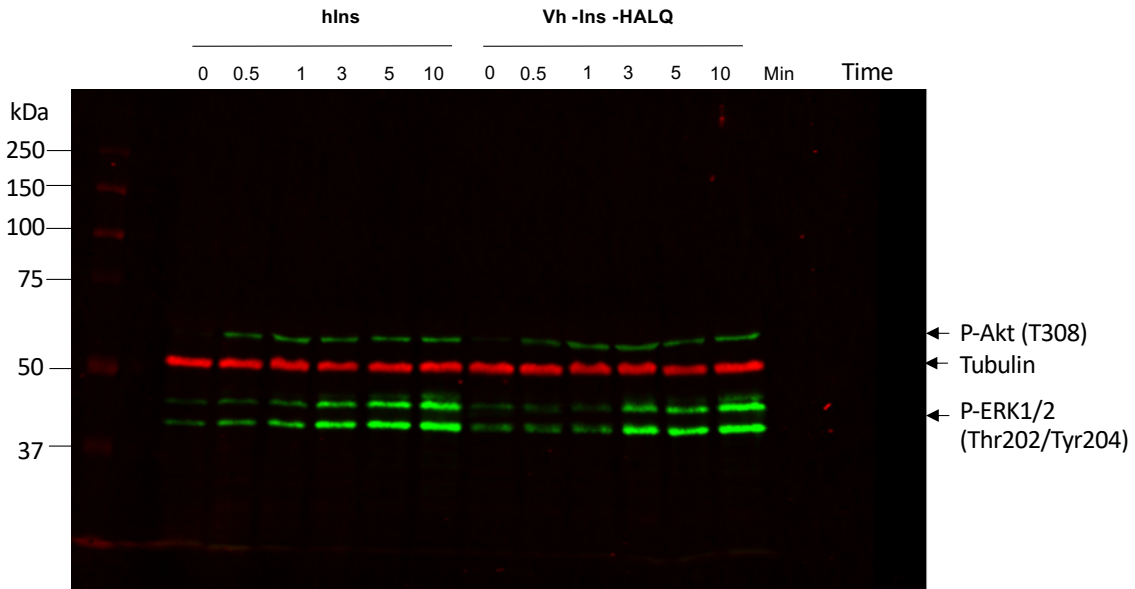

Supplement: NIHMS1774420-supplement-Unmodified_Gels_Fig6.pdf [file NIHMS1774420-supplement-Unmodified_Gels_Fig6.pdf]
